# Supplementary material for: A DFT Study of the Copolymerization of Methyl Vinyl Sulfone and Ethylene Catalyzed by Phosphine–Sulfonate and α-Diimine Palladium Complexes
Source: MDPI journal article supplement (doi:10.3390/catal13061026), 2023-06-20
Supplement: s1 [file s1]

Supplementary Materials:

# A DFT Study of the Copolymerization of Methyl Vinyl Sulfone and Ethylene Catalyzed by Phosphine–Sulfonate and $\alpha$ -Diimine Palladium Complexes

Ling Zhu <sup>1</sup>, Shuang Li <sup>1</sup>, Xiaohui Kang <sup>2,\*</sup>, Wenzhen Zhang <sup>1</sup> and Yi Luo <sup>1,3,\*</sup>

<sup>1</sup> State Key Laboratory of Fine Chemicals, School of Chemical Engineering, Dalian University of Technology, Dalian 116024, China

<sup>2</sup> College of Pharmacy, Dalian Medical University, Dalian 116044, China

<sup>3</sup> PetroChina Petrochemical Research Institute, Beijing 102200, China

\* Correspondence: kangxh@dmu.edu.cn (X.K.); luoyi@dlut.edu.cn (Y.L.)

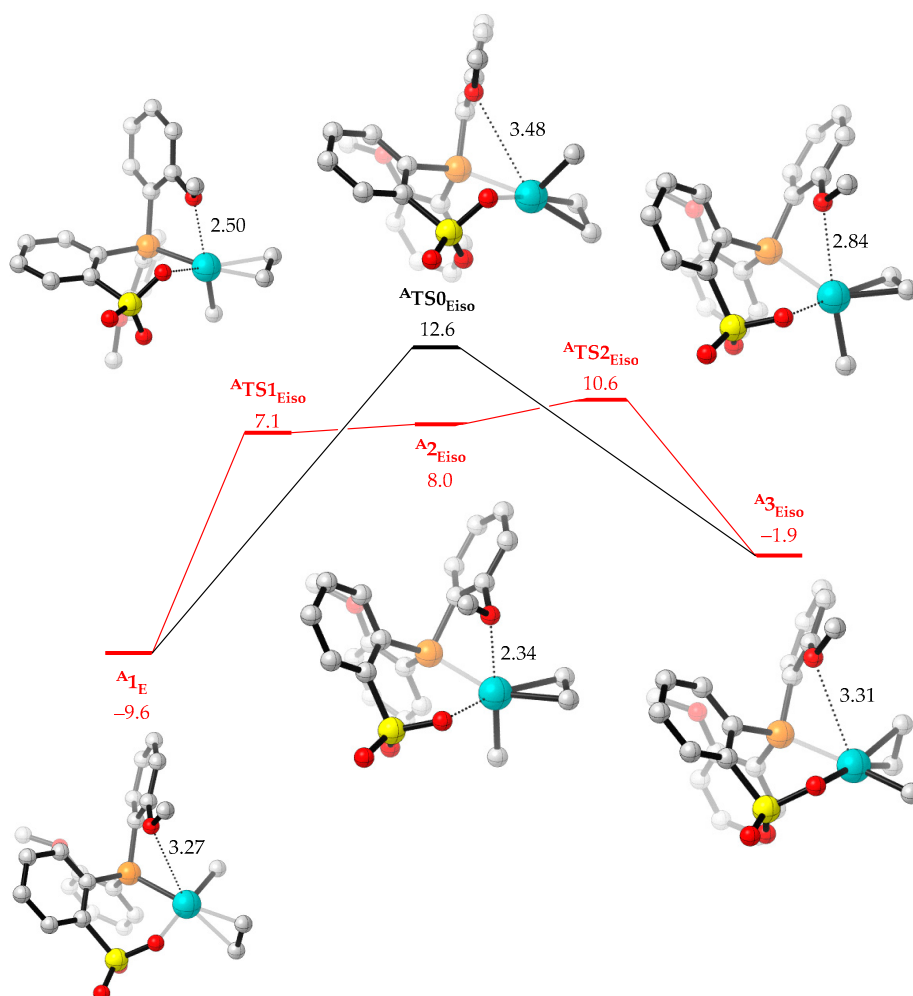

**Figure S1.** Calculated Gibbs free energy profile of *cis/trans* isomerization of ethylene mediated by A (distances in Å and energy in kcal/mol).

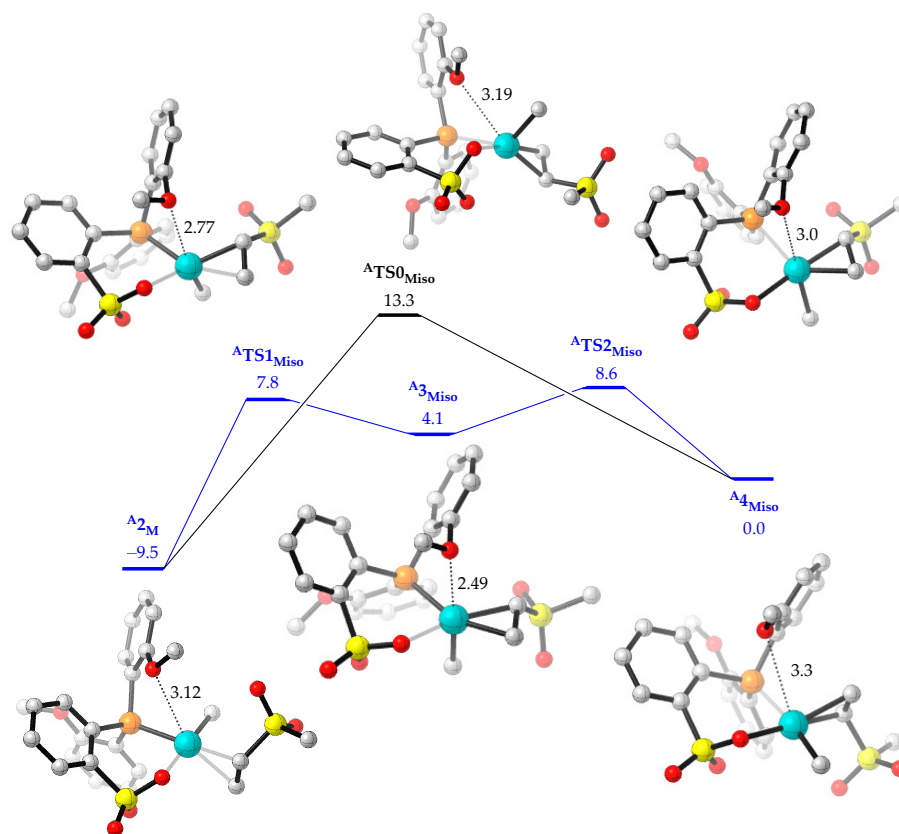

**Figure S2.** Calculated Gibbs free energy profile of *cis/trans* isomerization of MVS mediated by **A** (distances in Å and energy in kcal/mol).

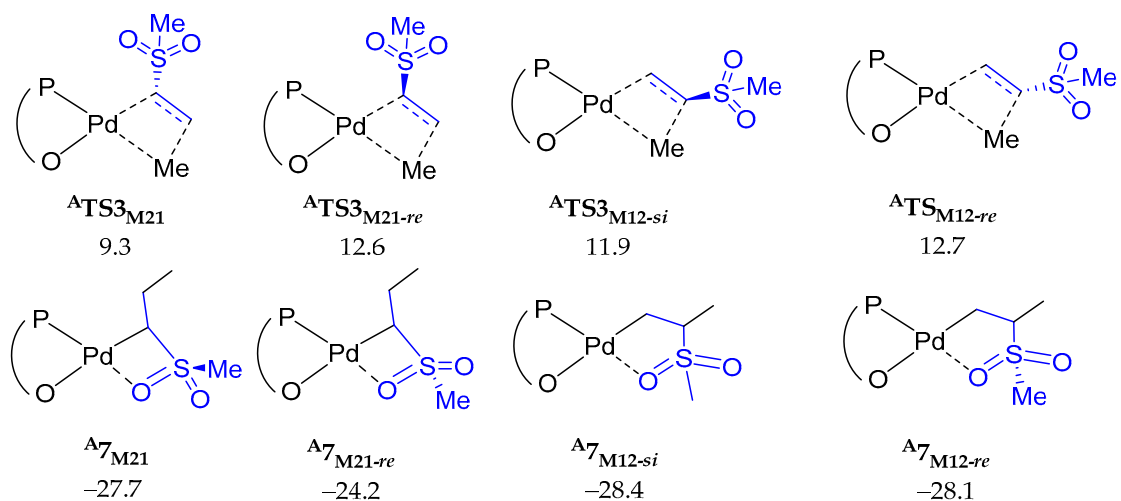

**Figure S3.** Four possible transition states and corresponding intermediate free energies (in kcal/mol) for insertion of MVS into the Pd–Me bond by complex **A**.

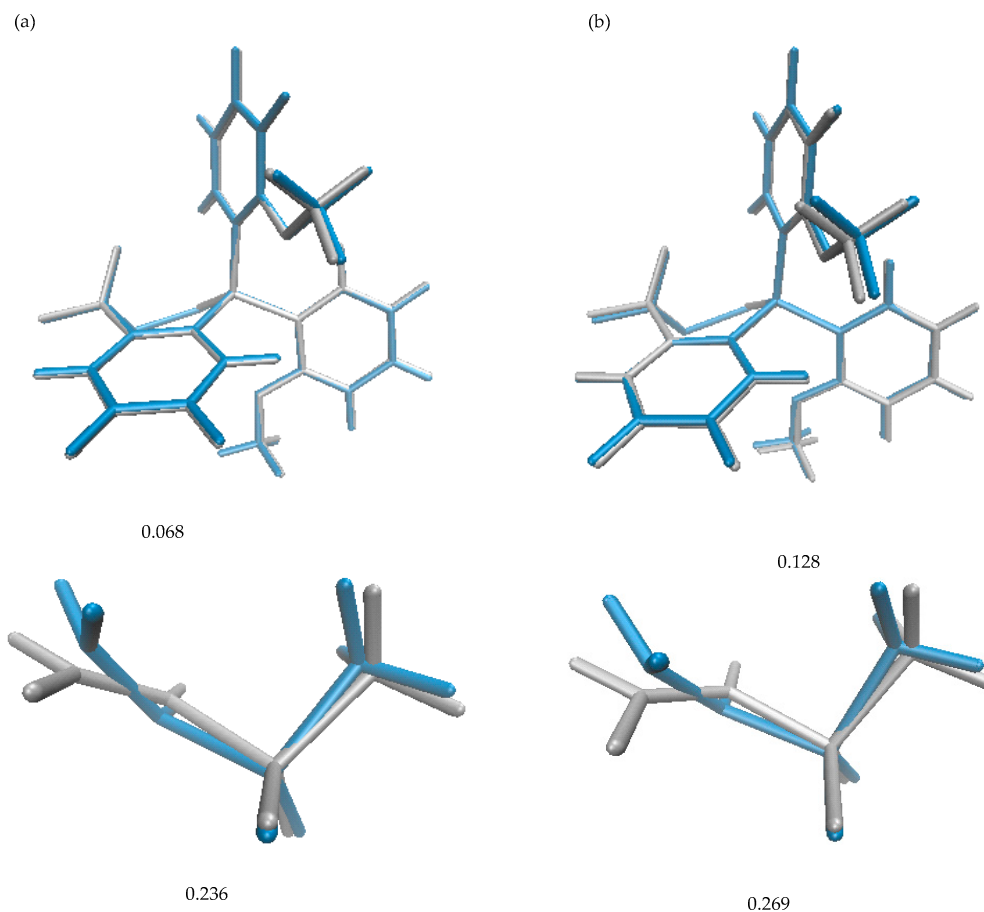

**Figure S4.** Overlay of catalysts and monomers in transition states and stable intermediates (**a**: 2,1-manner **b**: 1,2-manner) (in Å).

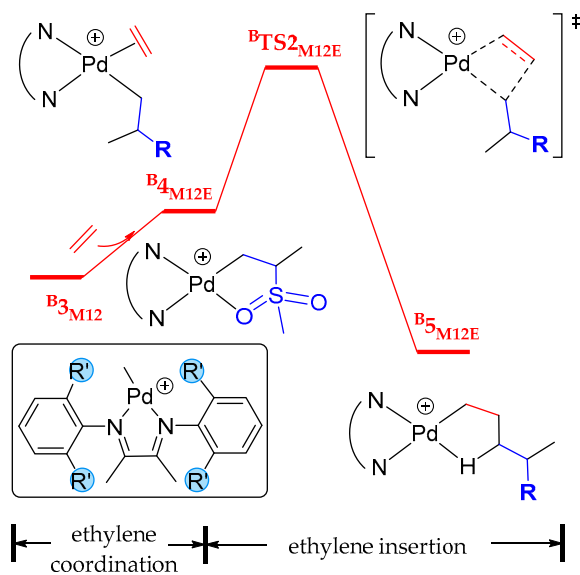

**Figure S5.** The considered chain propagation process based on MVS-inserted product  $\text{B}_3\text{M}_{12}$  by catalysts **B1–B7**.

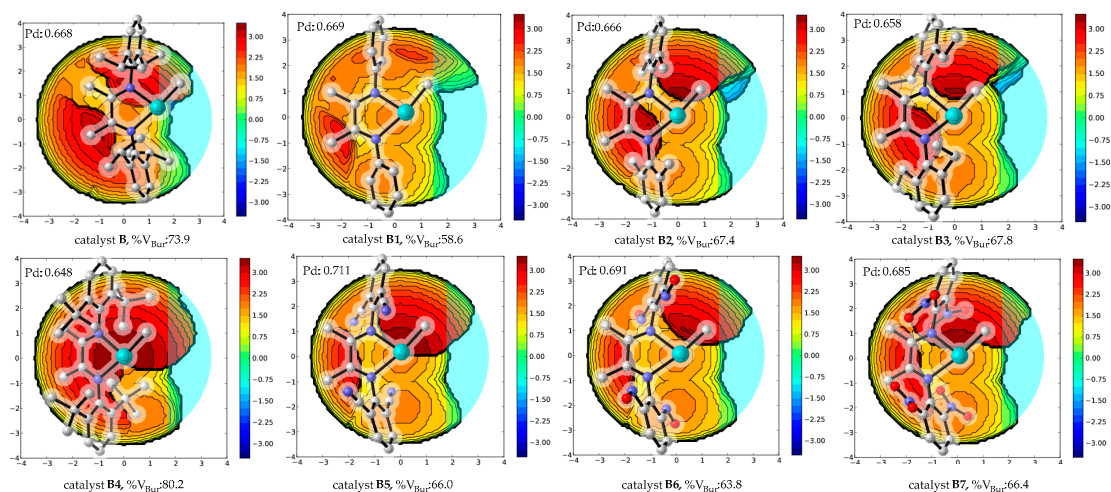

**Figure S6.** Topographical steric maps of catalysts B and B1–B7. The NBO charges on metal atoms are shown in black.

B3LYP-D3/6-31G(d,p)&SDD/SMD//B3LYP-D3/6-311+G (d,p)&Lanl2DZ

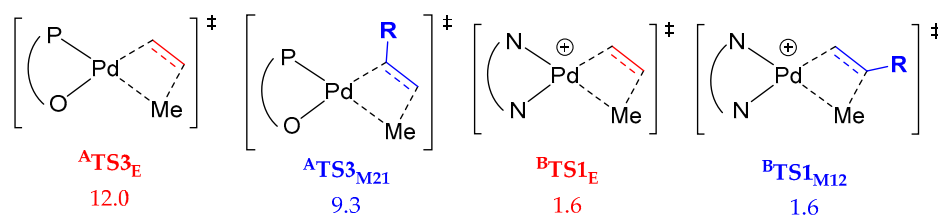

B3LYP/6-31G(d,p)&SDD/SMD//B3LYP/6-311+G (d,p)&Lanl2DZ

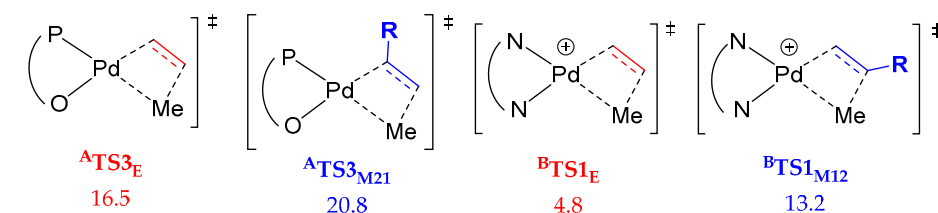

B3LYP-D3/6-31G(d,p)&SDD/SMD//B3LYP-D3/6-311+G (d,p)&SDD

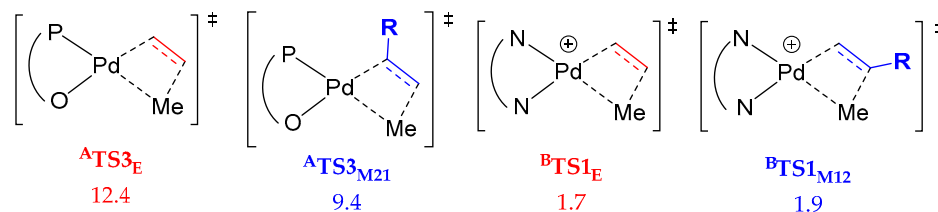

M06-L-D3/6-31G(d,p)&SDD/SMD//B3LYP-D3/6-311+G (d,p)&Lanl2DZ

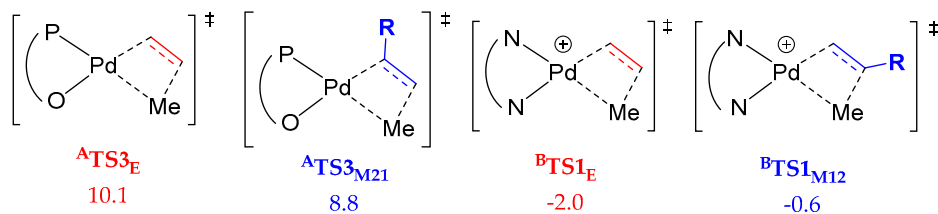

M06-D3/6-31G(d,p)&SDD/SMD//B3LYP-D3/6-311+G (d,p)&Lanl2DZ

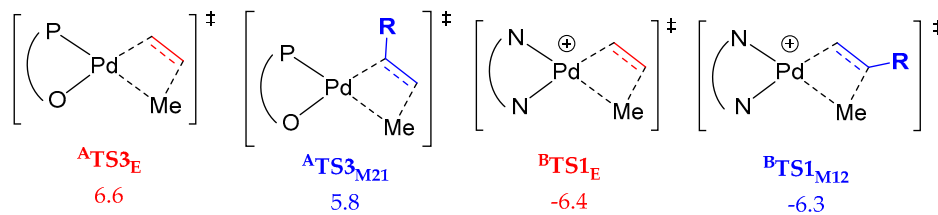

B97D3/6-31G(d,p)&SDD/SMD//B3LYP-D3/6-311+G (d,p)&Lanl2DZ

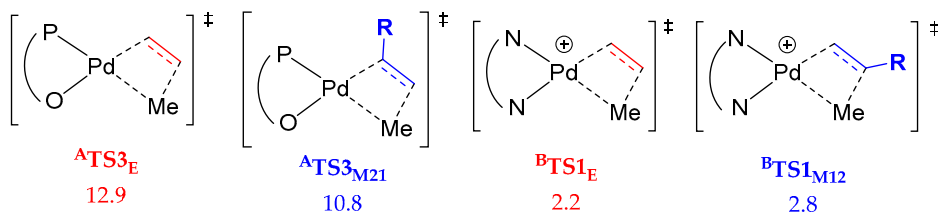

**Figure S7.** Calculated relative Gibbs free energies by different basis sets and methods (in kcal/mol). The relative energies of the corresponding catalysts and monomers were set to be 0.0 kcal/mol.

**Table S1.** Calculated thermodynamic corrections for Gibbs free energies ( $\Delta G_{\text{cor}}$  in Hartrees), solution-phase single-point energies ( $\Delta E_{\text{sol}}$  in Hartrees) and solution-phase Gibbs free energies ( $\Delta G_{\text{sol}}$  in Hartrees).

| Computational level: B3LYP-D3/6-31G(d,p)&SDD/SMD//B3LYP-D3/6-311+G<br>(d,p)&Lanl2DZ |                         |                         |                         |
|-------------------------------------------------------------------------------------|-------------------------|-------------------------|-------------------------|
| species                                                                             | $\Delta G_{\text{cor}}$ | $\Delta E_{\text{sol}}$ | $\Delta G_{\text{sol}}$ |
| <b>A0</b>                                                                           | 0.321177                | -2056.885134            | -2056.560929            |
| <b>B0</b>                                                                           | 0.589031                | -1368.712850            | -1368.120791            |
| ethylene                                                                            | 0.029582                | -78.617676              | -78.585066              |
| MVS                                                                                 | 0.059616                | -666.603201             | -666.540557             |
| <b>A1<sub>E</sub></b>                                                               | 0.371631                | -2135.53591             | -2135.161251            |
| <b>AT<sub>S0</sub><sub>Eiso</sub></b>                                               | 0.371604                | -2135.500572            | -2135.12594             |
| <b>AT<sub>S1</sub><sub>Eiso</sub></b>                                               | 0.374802                | -2135.512441            | -2135.134611            |
| <b>A<sub>2</sub><sub>Eiso</sub></b>                                                 | 0.373589                | -2135.509851            | -2135.133234            |
| <b>AT<sub>S2</sub><sub>Eiso</sub></b>                                               | 0.373151                | -2135.505272            | -2135.129093            |
| <b>A<sub>3</sub><sub>Eiso</sub></b>                                                 | 0.372247                | -2135.524362            | -2135.149087            |
| <b>A<sub>4</sub><sub>E</sub></b>                                                    | 0.372194                | -2135.514041            | -2135.138819            |
| <b>AT<sub>S3</sub><sub>E</sub></b>                                                  | 0.372886                | -2135.502851            | -2135.126937            |
| <b>A<sub>5</sub><sub>E</sub></b>                                                    | 0.373736                | -2135.543461            | -2135.166697            |
| <b>A<sub>6</sub><sub>E</sub></b>                                                    | 0.373063                | -2135.547256            | -2135.171165            |
| <b>A<sub>1</sub><sub>M</sub></b>                                                    | 0.401087                | -2723.528498            | -2723.124383            |
| <b>A<sub>2</sub><sub>M</sub></b>                                                    | 0.404924                | -2723.524548            | -2723.116596            |
| <b>AT<sub>S0</sub><sub>Miso</sub></b>                                               | 0.403249                | -2723.486610            | -2723.080333            |
| <b>AT<sub>S1</sub><sub>Miso</sub></b>                                               | 0.406106                | -2723.498255            | -2723.089121            |
| <b>A<sub>3</sub><sub>Miso</sub></b>                                                 | 0.405848                | -2723.503831            | -2723.094955            |
| <b>AT<sub>S2</sub><sub>Miso</sub></b>                                               | 0.404461                | -2723.495330            | -2723.087841            |
| <b>A<sub>4</sub><sub>Miso</sub></b>                                                 | 0.403832                | -2723.508328            | -2723.101468            |
| <b>A<sub>5</sub><sub>M21</sub></b>                                                  | 0.405009                | -2723.499433            | -2723.091396            |
| <b>AT<sub>S3</sub><sub>M21</sub></b>                                                | 0.406522                | -2723.496237            | -2723.086687            |
| <b>AT<sub>S3</sub><sub>M21-re</sub></b>                                             | 0.406855                | -2723.491354            | -2723.081471            |
| <b>A<sub>7</sub><sub>M21-re</sub></b>                                               | 0.410888                | -2723.553987            | -2723.140071            |
| <b>AT<sub>S3</sub><sub>M12-si</sub></b>                                             | 0.406059                | -2723.491600            | -2723.082513            |
| <b>A<sub>7</sub><sub>M12-si</sub></b>                                               | 0.408956                | -2723.558721            | -2723.146737            |
| <b>AT<sub>S3</sub><sub>M12-re</sub></b>                                             | 0.404891                | -2723.489215            | -2723.081296            |
| <b>A<sub>7</sub><sub>M12-re</sub></b>                                               | 0.409665                | -2723.558967            | -2723.146274            |
| <b>A<sub>6</sub><sub>M21</sub></b>                                                  | 0.408513                | -2723.544835            | -2723.133294            |
| <b>A<sub>7</sub><sub>M21</sub></b>                                                  | 0.408999                | -2723.557621            | -2723.145594            |
| <b>A<sub>7</sub><sub>EE</sub></b>                                                   | 0.426517                | -2214.193457            | -2213.763912            |
| <b>AT<sub>S4</sub><sub>EEiso</sub></b>                                              | 0.427766                | -2214.167119            | -2213.736325            |
| <b>A<sub>8</sub><sub>EEiso</sub></b>                                                | 0.426254                | -2214.170369            | -2213.741087            |
| <b>AT<sub>S5</sub><sub>EEiso</sub></b>                                              | 0.427112                | -2214.166839            | -2213.736699            |
| <b>A<sub>9</sub><sub>EE</sub></b>                                                   | 0.42674                 | -2214.183465            | -2213.753697            |

|                                   |          |              |              |
|-----------------------------------|----------|--------------|--------------|
| <sup>A</sup> 10 <sub>EE</sub>     | 0.426281 | -2214.173205 | -2213.743896 |
| <sup>A</sup> TS6 <sub>EE</sub>    | 0.427047 | -2214.161315 | -2213.73124  |
| <sup>A</sup> 11 <sub>EE</sub>     | 0.427778 | -2214.199583 | -2213.768777 |
| <sup>A</sup> 12 <sub>EE</sub>     | 0.425899 | -2214.204582 | -2213.775655 |
| <sup>A</sup> 7 <sub>EM</sub>      | 0.457704 | -2802.187762 | -2801.72703  |
| <sup>A</sup> 8 <sub>EM</sub>      | 0.458502 | -2802.182122 | -2801.720592 |
| <sup>A</sup> TS4 <sub>EMiso</sub> | 0.459726 | -2802.152424 | -2801.68967  |
| <sup>A</sup> 9 <sub>EMiso</sub>   | 0.459788 | -2802.156378 | -2801.693562 |
| <sup>A</sup> TS5 <sub>EMiso</sub> | 0.461056 | -2802.155475 | -2801.691391 |
| <sup>A</sup> 10 <sub>EM</sub>     | 0.457554 | -2802.169451 | -2801.708869 |
| <sup>A</sup> 11 <sub>EM</sub>     | 0.459054 | -2802.161384 | -2801.699302 |
| <sup>A</sup> TS6 <sub>EM</sub>    | 0.460555 | -2802.157002 | -2801.693419 |
| <sup>A</sup> 12 <sub>EM</sub>     | 0.462304 | -2802.200931 | -2801.735599 |
| <sup>A</sup> 13 <sub>EM</sub>     | 0.462137 | -2802.215661 | -2801.750496 |
| <sup>A</sup> 8 <sub>ME</sub>      | 0.463404 | -2802.194788 | -2801.728356 |
| <sup>A</sup> TS4 <sub>MEiso</sub> | 0.462737 | -2802.162484 | -2801.696719 |
| <sup>A</sup> 9 <sub>MEiso</sub>   | 0.462141 | -2802.165880 | -2801.700711 |
| <sup>A</sup> TS5 <sub>MEiso</sub> | 0.461203 | -2802.160567 | -2801.696336 |
| <sup>A</sup> 10 <sub>ME</sub>     | 0.46188  | -2802.186979 | -2801.722071 |
| <sup>A</sup> 11 <sub>ME</sub>     | 0.462456 | -2802.179827 | -2801.714343 |
| <sup>A</sup> TS6 <sub>ME</sub>    | 0.460552 | -2802.159558 | -2801.695978 |
| <sup>A</sup> 12 <sub>ME</sub>     | 0.465222 | -2802.216627 | -2801.748377 |
| <sup>B</sup> 1 <sub>E</sub>       | 0.643321 | -1447.380075 | -1446.733726 |
| <sup>B</sup> TS1 <sub>E</sub>     | 0.644326 | -1447.350670 | -1446.703316 |
| <sup>B</sup> 2 <sub>E</sub>       | 0.643846 | -1447.379308 | -1446.732434 |
| <sup>B</sup> 3 <sub>E</sub>       | 0.641615 | -1447.389173 | -1446.744530 |
| <sup>B</sup> 1 <sub>M</sub>       | 0.670899 | -2035.365990 | -2034.692063 |
| <sup>B</sup> 2 <sub>M12</sub>     | 0.674888 | -2035.359010 | -2034.681094 |
| <sup>B</sup> TS1 <sub>M12</sub>   | 0.676324 | -2035.338145 | -2034.658793 |
| <sup>B</sup> 3 <sub>M12</sub>     | 0.678016 | -2035.406298 | -2034.725254 |
| <sup>B</sup> 2 <sub>M21</sub>     | 0.680377 | -2035.361249 | -2034.677844 |
| <sup>B</sup> TS1 <sub>M21</sub>   | 0.677834 | -2035.337289 | -2034.656427 |
| <sup>B</sup> 3 <sub>M21</sub>     | 0.677807 | -2035.401918 | -2034.721083 |
| <sup>B</sup> 4 <sub>M12E</sub>    | 0.731374 | -2114.031980 | -2113.297578 |
| <sup>B</sup> TS2 <sub>M12E</sub>  | 0.730368 | -2113.995897 | -2113.262501 |
| <sup>B</sup> 5 <sub>M12E</sub>    | 0.731723 | -2114.031879 | -2113.297128 |
| <sup>B</sup> 6 <sub>M12E</sub>    | 0.737891 | -2114.060060 | -2113.319141 |
| <sup>B</sup> 4 <sub>M21E</sub>    | 0.735781 | -2114.033821 | -2113.295012 |
| <sup>B</sup> TS2 <sub>M21E</sub>  | 0.733774 | -2113.995356 | -2113.258554 |
| <sup>B</sup> 5 <sub>M21E</sub>    | 0.731873 | -2114.060217 | -2113.325316 |
| <sup>B</sup> 1                    | -        | -896.752514  | -            |
| <sup>B</sup> 13 <sub>M12</sub>    | 0.357831 | -1563.445784 | -1563.084925 |
| <sup>B</sup> 14 <sub>M12E</sub>   | 0.406441 | -1642.071083 | -1641.661614 |

|                                                                                             |          |              |              |
|---------------------------------------------------------------------------------------------|----------|--------------|--------------|
| <b>B1TS2<sub>M12E</sub></b>                                                                 | 0.408263 | -1642.038452 | -1641.627161 |
| <b>B2</b>                                                                                   | -        | -1054.085972 | -            |
| <b>B23<sub>M12</sub></b>                                                                    | 0.460186 | -1720.779155 | -1720.315941 |
| <b>B24<sub>M12E</sub></b>                                                                   | 0.512109 | -1799.405993 | -1798.890856 |
| <b>B2TS2<sub>M12E</sub></b>                                                                 | 0.51238  | -1799.374220 | -1798.858812 |
| <b>B3</b>                                                                                   | -        | -1211.396710 | -            |
| <b>B33<sub>M12</sub></b>                                                                    | 0.570087 | -1878.090480 | -1877.517365 |
| <b>B34<sub>M12E</sub></b>                                                                   | 0.62138  | -1956.716167 | -1956.091759 |
| <b>B3TS2<sub>M12E</sub></b>                                                                 | 0.622961 | -1956.685609 | -1956.05962  |
| <b>B4</b>                                                                                   | -        | -1525.979569 | -            |
| <b>B43<sub>M12</sub></b>                                                                    | 0.794833 | -2192.673584 | -2191.875723 |
| <b>B44<sub>M12E</sub></b>                                                                   | 0.845747 | -2271.293873 | -2270.445098 |
| <b>B4TS2<sub>M12E</sub></b>                                                                 | 0.847142 | -2271.263911 | -2270.413741 |
| <b>B5</b>                                                                                   | -        | -1265.809304 | -            |
| <b>B53<sub>M12</sub></b>                                                                    | 0.344306 | -1932.506629 | -1932.159295 |
| <b>B54<sub>M12E</sub></b>                                                                   | 0.392661 | -2011.135480 | -2010.739791 |
| <b>B5TS2<sub>M12E</sub></b>                                                                 | 0.394127 | -2011.103126 | -2010.705971 |
| <b>B6</b>                                                                                   | -        | -1414.049995 | -            |
| <b>B63<sub>M12</sub></b>                                                                    | 0.3346   | -2080.746244 | -2080.408616 |
| <b>B64<sub>M12E</sub></b>                                                                   | 0.383469 | -2159.375197 | -2158.9887   |
| <b>B6TS2<sub>M12E</sub></b>                                                                 | 0.383119 | -2159.338828 | -2158.952681 |
| <b>B7</b>                                                                                   | -        | -1714.983068 | -            |
| <b>B73<sub>M12</sub></b>                                                                    | 0.35524  | -2381.682892 | -2381.324624 |
| <b>B74<sub>M12E</sub></b>                                                                   | 0.40257  | -2460.309932 | -2459.904334 |
| <b>B7TS2<sub>M12E</sub></b>                                                                 | 0.404218 | -2460.278604 | -2459.871358 |
| <b>Computational level: B3LYP/6-31G(d,p)&amp;SDD/SMD//B3LYP/6-311+G (d,p)&amp;Lanl2DZ</b>   |          |              |              |
| <b>A0</b>                                                                                   | 0.320656 | -2056.809506 | -2056.485822 |
| <b>B0</b>                                                                                   | 0.589947 | -1368.608936 | -1368.015961 |
| ethylene                                                                                    | 0.029574 | -78.616831   | -78.58422916 |
| MVS                                                                                         | 0.059664 | -666.594727  | -666.5320352 |
| <b>A<sup>+</sup>TS3<sub>E</sub></b>                                                         | 0.372355 | -2135.419094 | -2135.043711 |
| <b>A<sup>+</sup>TS3<sub>M21</sub></b>                                                       | 0.403994 | -2723.391697 | -2722.984675 |
| <b>B<sup>+</sup>TS1<sub>E</sub></b>                                                         | 0.638633 | -1447.234195 | -1446.592534 |
| <b>B<sup>+</sup>TS1<sub>M12</sub></b>                                                       | 0.671402 | -2035.20143  | -2034.527    |
| <b>Computational level: B3LYP-D3/6-31G(d,p)&amp;SDD/SMD//B3LYP-D3/6-311+G (d,p)&amp;SDD</b> |          |              |              |
| <b>A0</b>                                                                                   | 0.320928 | -2056.885039 | -2056.561083 |
| <b>B0</b>                                                                                   | 0.588617 | -1368.712846 | -1368.121201 |
| ethylene                                                                                    | 0.029582 | -78.617676   | -78.58506616 |
| MVS                                                                                         | 0.059616 | -666.603201  | -666.5405572 |
| <b>A<sup>+</sup>TS3<sub>E</sub></b>                                                         | 0.644196 | -1447.350775 | -1446.703551 |
| <b>A<sup>+</sup>TS3<sub>M21</sub></b>                                                       | 0.676202 | -2035.337886 | -2034.658656 |
| <b>B<sup>+</sup>TS1<sub>E</sub></b>                                                         | 0.373448 | -2135.502883 | -2135.126407 |
| <b>B<sup>+</sup>TS1<sub>M12</sub></b>                                                       | 0.406712 | -2723.496346 | -2723.086606 |



| Computational level: M06-L-D3/6-31G(d,p)&SDD/SMD//B3LYP-D3/6-311+G<br>(d,p)&Lanl2DZ |          |              |              |
|-------------------------------------------------------------------------------------|----------|--------------|--------------|
| <sup>A</sup> 0                                                                      | 0.321177 | -2056.681416 | -2056.357211 |
| <sup>B</sup> 0                                                                      | 0.589031 | -1368.50319  | -1367.911131 |
| ethylene                                                                            | 0.029582 | -78.59476    | -78.56215016 |
| MVS                                                                                 | 0.059616 | -666.537524  | -666.4748802 |
| <sup>A</sup> TS3E                                                                   | 0.372886 | -2135.279196 | -2134.903282 |
| <sup>A</sup> TS3M21                                                                 | 0.406522 | -2723.227678 | -2722.818128 |
| <sup>B</sup> TS1 <sub>E</sub>                                                       | 0.644326 | -1447.123748 | -1446.476394 |
| <sup>B</sup> TS1 <sub>M12</sub>                                                     | 0.676324 | -2035.066395 | -2034.387043 |
| Computational level: M06-D3/6-31G(d,p)&SDD/SMD//B3LYP-D3/6-311+G<br>(d,p)&Lanl2DZ   |          |              |              |
| <sup>A</sup> 0                                                                      | 0.321177 | -2055.928937 | -2055.604732 |
| <sup>B</sup> 0                                                                      | 0.589031 | -1367.622463 | -1367.030404 |
| ethylene                                                                            | 0.029582 | -78.539734   | -78.50712416 |
| MVS                                                                                 | 0.059616 | -666.389759  | -666.3271152 |
| <sup>A</sup> TS3E                                                                   | 0.372886 | -2134.477209 | -2134.101295 |
| <sup>A</sup> TS3M21                                                                 | 0.406522 | -2722.332177 | -2721.922627 |
| <sup>B</sup> TS1 <sub>E</sub>                                                       | 0.644326 | -1446.195119 | -1445.547765 |
| <sup>B</sup> TS1 <sub>M12</sub>                                                     | 0.676324 | -2034.04691  | -2033.367558 |
| Computational level: B97D3/6-31G(d,p)&SDD/SMD//B3LYP-D3/6-311+G (d,p)&Lanl2DZ       |          |              |              |
| <sup>A</sup> 0                                                                      | 0.321177 | -2056.248052 | -2055.923847 |
| <sup>B</sup> 0                                                                      | 0.589031 | -1367.985846 | -1367.393787 |
| ethylene                                                                            | 0.029582 | -78.557199   | -78.52458916 |
| MVS                                                                                 | 0.059616 | -666.43018   | -666.3675362 |
| <sup>A</sup> TS3E                                                                   | 0.372886 | -2134.803729 | -2134.427815 |
| <sup>A</sup> TS3M21                                                                 | 0.406522 | -2722.683742 | -2722.274192 |
| <sup>B</sup> TS1 <sub>E</sub>                                                       | 0.644326 | -1446.562199 | -1445.914845 |
| <sup>B</sup> TS1 <sub>M12</sub>                                                     | 0.676324 | -2034.436238 | -2033.756886 |
